# Supplementary material
Source: Springer Nature journal article supplement (https://www.springermedizin.de/resource/supplementary/12913_2012_2643_MOESM3_ESM.pdf/9531042)
Supplement: MOESM3 [file 9531042]

Coming up with the goals....

1. What are your main difficulties?

*"This is where I'm at just now"*

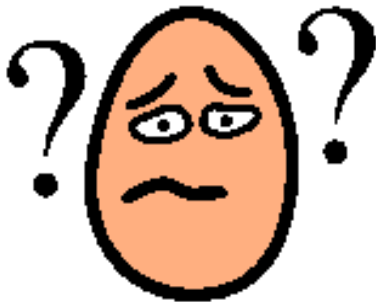

- 
- 
- 
- 
- 
- 

2. What are your specific goals?

*"This is where I'd like to get to"*

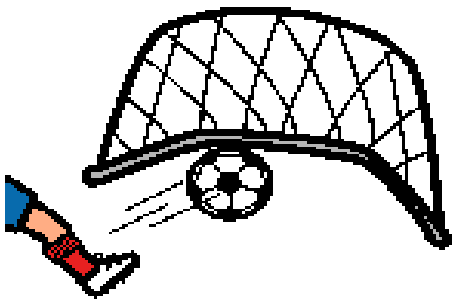

- 
- 
- 
- 
- 
-
